# Supplementary material for: An Anaplasma phagocytophilum T4SS effector, AteA, is essential for tick infection
Source: PubMed Central journal article supplement (PMC10653876; doi:10.1128/mbio.01711-23), 2023-09-25
Supplement: mbio.01711-23-s0002.pdf [file mbio.01711-23-s0002.pdf]

**Supplemental Table 1.** Oligonucleotides used in this study

| Name                      | SEQ                                                            | Purpose                                                                      |
|---------------------------|----------------------------------------------------------------|------------------------------------------------------------------------------|
| msp5 RT-qPCR F            | TGCGGAAGCTGGTATGGTATC                                          | Quantify msp5 transcripts                                                    |
| msp5 RT-qPCR R            | CTCATTAAACCTTTCAACAGTGTCA                                      |                                                                              |
| groEL F                   | AGGGAGGTAGTACGCATCCTAGA                                        | Quantify groEL transcripts                                                   |
| groEL R                   | TGTGATCTCTGGCGACCCATAA                                         |                                                                              |
| rpoB F                    | GGCCTATGGTGCTGCTTATAC                                          | Quantify rpoB transcripts                                                    |
| rpoB R                    | CCACACTCGAAGTTGCTATCC                                          |                                                                              |
| 2492 qPCR F               | GGCCTTGCTGCTTCCATAACC                                          | qPCR of HGE1_2492 primers                                                    |
| 2492 qPCR R               | CTCTGTAGAAGGTGTTGCGTCTTC                                       |                                                                              |
| msp5 qPCR F               | AGATGCTGACTGGGGATGAG                                           | quantification of msp5 Ap DNA                                                |
| msp5 qPCR R               | TCGGCATCAACCAAGTACAA                                           |                                                                              |
| crt ISE6 F                | GTCAAAGTCCGGCACAATCT                                           | quantification of crt gene in ISE6 DNA                                       |
| crt ISE6 R                | CATCTTCTTCTCGGCATCCTT                                          |                                                                              |
| tlr9 F                    | CCCAGTCTTGGACTCAGAATTAG                                        | quantification of tlr9 gene in HL60 DNA                                      |
| tlr9 R                    | GGTATAGCCAGGGATTGGTTAAG                                        |                                                                              |
| Ap 16S-FL_F               | TCCTGGCTCAGAACGAACG                                            | Amplify full Ap 16s for qPCR standard                                        |
| Ap 16S-FL_R               | GTCACTGACCCAACCTTAAATGG                                        |                                                                              |
| M.m. B-actin_qPCR-R       | ACGCGGGAGGAAGAGGATGCGGCAGTG                                    | Quantify mouse actin transcripts                                             |
| M.m. B-actin_qPCR-F       | ACGCAGAGGGAAATCGTGCGTGAC                                       |                                                                              |
| Ap16s_qPCR-F              | CCCTAAGGCCTTCCTCACTC                                           | Quantify Anaplasma burden in mouse blood                                     |
| Ap16s_qPCR-R              | CAGCCACTGGAAGTGAAGA                                            |                                                                              |
| ISE6 actin full R         | TACTGTAAAAACAATTTTTATTCCACCAATGAAG                             | Amplify ISE6 actin for qPCR standard.                                        |
| ISE6 Actin Full F         | ATTTCTTTACCATATTTTGGAAAGTACGCCACG                              |                                                                              |
| I.s. actin_qPCR-F3        | GCCGGGACCTTACAGACTATC                                          | Quantify Ixodes scapularis tick actin primers                                |
| I.s. actin_qPCR-R3        | CACGGACAATTCACGCTCG                                            |                                                                              |
| Ap16s_qPCR-tick F         | AAGCACTCGCCTGGGGACT                                            | Quantify Anaplasma burden in ticks                                           |
| Ap16s_qPCR-tick R         | CCATGTCAAGGAGTGGTAAGG                                          |                                                                              |
| ChUp & out                | ATTATCTTCCTCTCCCTTGCTGACC                                      | PCR and sequencing outward from Himar1 transposon                            |
| HGE1_02492 F              | GGGGACAAGTTTGTACAAAAAAGCAGGCTTAATGGGAAAATTAACAAAAATC           | Gateway compatible HGE1_02492 cloning primers                                |
| HGE1_02492 R With Stop    | GGGGACCACCTTTGTACAAGAAAGCTGGGTACTAGAAACGTGCCCTTGATG            |                                                                              |
| 2492_EE1074KK_F           | GAATTAGCAAAACAACCTTAAGAAAGGAGGAGTTCTTACGCAAGTGCTTGC            | Site directed primers to reverse HGE1_02492 C-terminal charges               |
| 2492_EE1074KK_R           | GCGTAAGAACTCCTCCTTTCTTAAGTTGTTTTGCTAATTCATGTACAGAT             |                                                                              |
| 2492-11aa C-term GW_R     | GGGGACCACCTTTGTACAAGAAAGCTGGGTATTAAGCACTTGCGTAAGAACTCCTCCTTC   | Clone HGE1_02492 removing 11aa from the C-terminus                           |
| 2492 aa 251-1094 F        | GGGGACAAGTTTGTACAAAAAAGCAGGCTTAAGCGCTTCTAAGCACGATGG            | Clone HGE1_02492 fragments into pDONR via gateway                            |
| 2492 aa 558-1094 F        | GGGGACAAGTTTGTACAAAAAAGCAGGCTTAAGTATGCTGACAAACAACTACTACC       | Clone HGE1_02492 fragments into pDONR via gateway                            |
| 2492 aa 1-266 R           | GGGGACCACCTTTGTACAAGAAAGCTGGGTACTACTGCTTATTAGAGGAATTAGACTCTTC  | Clone HGE1_02492 fragments into pDONR via gateway                            |
| 2492 aa 1-574 R           | GGGGACCACCTTTGTACAAGAAAGCTGGGTACTAGTTTTTCAAAGATTTGGGTTCCGGG    | Clone HGE1_02492 fragments into pDONR via gateway                            |
| 2492 918 C-term GW F      | GGGGACAAGTTTGTACAAAAAAGCAGGCTTAAGTAACAGTGAGATTAAGCAAGTCT       | Clone HGE1_02492 fragments into pDONR via gateway                            |
| 2492 aa918 stopCterm GW R | GGGGACCACCTTTGTACAAGAAAGCTGGGTACTAAGACTTGCTTTTAACTCTCACTGTTACT | Clone HGE1_02492 fragments into pDONR via gateway                            |
| 2492 5' rev               | GCTTCCGCAGAATCATTAGATTGCGGG                                    | sequence from HGE1_02492 into vector                                         |
| 2492 3' F                 | GTGCAAGCACTACAACAAGAAAGGC                                      |                                                                              |
| peGFP C1 seq              | CATGGTCCTGCTGGAGTTCGTG                                         | sequencing pEGFP C1                                                          |
| 2492 int F                | CTCAGGTTTCAGTTACGGGTTCTG                                       | Test purity of the HGE1_02492::Himar1 mutant and internal sequencing primers |
| 2492 int R                | AGCTCAATAGAAGTAGTAGGCTTGC                                      |                                                                              |
